# Supplementary material
Source: Springer Nature journal article supplement (https://www.springermedizin.de/resource/supplementary/12885_2012_3775_MOESM8_ESM.pdf/9464424)

Type IV collagen

Integrin  $\alpha 1$

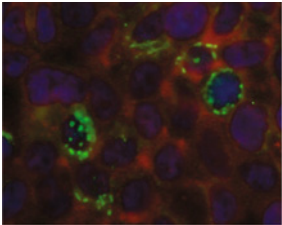

Integrin  $\alpha 2$

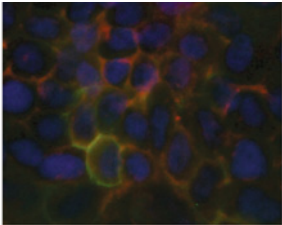

Integrin  $\beta 1$

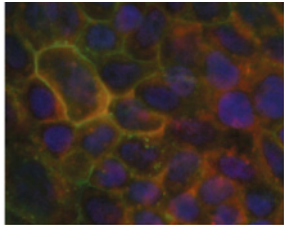

Supplement: MOESM8 [file 9464424]
